# Supplementary material for: A copper–platinum nanoplatform for synergistic photothermal and chemodynamic tumor therapy via ROS outburst and GSH exhaustion
Source: Royal Society of Chemistry journal article supplement (doi:10.1039/d3tb02288a), 2024-01-01
Supplement: d3tb02288a1.pdf [file d3tb02288a1.pdf]

1 Supporting Information

2 **A Copper-Platinum Nanoplatfom for Synergistic Tumor Photothermal and**

3 **Chemodynamic Therapy by ROS Outburst and GSH Exhaustion**

4 *Chao Li<sup>#</sup>, Wenqing Jia<sup>#</sup>, Zichao Guo<sup>#</sup>, Yan Kang, Chaohui Zhou, Ren Zhao\*, Xi Cheng\*, and*  
5 *Nengqin Jia\**

6

7 Author affiliations:

8 *Chao Li, Yan Kang, Chaohui Zhou, and Nengqin Jia.*

9 The Education Ministry Key Lab of Resource Chemistry, Joint International Research

10 Laboratory of Resource Chemistry, Ministry of Education, Shanghai Frontiers Science Center

11 of Biomimetic Catalysis, and Shanghai Key Laboratory of Rare Earth Functional Materials,

12 College of Chemistry and Materials Science, Shanghai Normal University, Shanghai, 200234,

13 China.

14 E-mail: [nqjia@shnu.edu.cn](mailto:nqjia@shnu.edu.cn).

15

16 *Wenqing Jia, Zichao Guo, Ren Zhao, and Xi Cheng.*

17 Department of General Surgery, Ruijin Hospital, Shanghai Jiao Tong University School of

18 Medicine, Shanghai, 200025, China.

19 Shanghai Institute of Digestive Surgery, Ruijin Hospital, Shanghai Jiao Tong University

20 School of Medicine, Shanghai, China, 200025.

21 E-mail: [rjzhaoren@139.com](mailto:rjzhaoren@139.com); [drchengxi@126.com](mailto:drchengxi@126.com).

22

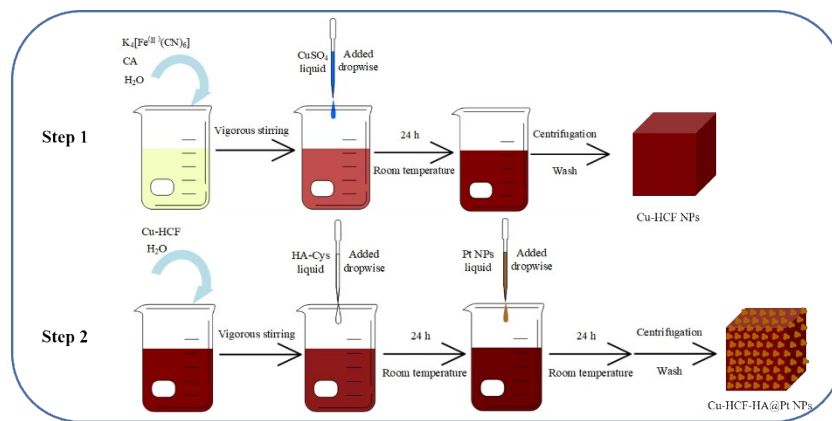

23

24

**Figure S1.** Synthesis of Cu-HCF-HA@Pt NPs.

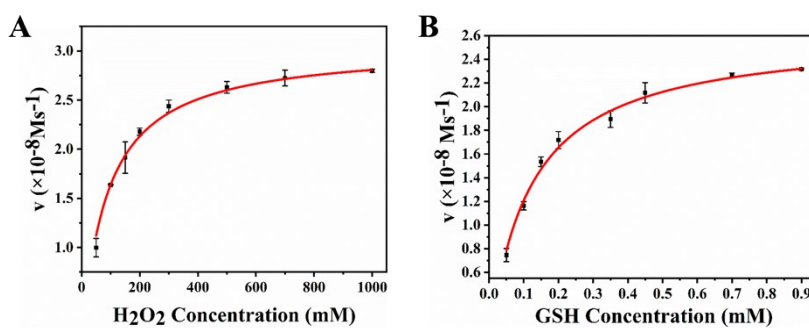

25

26 **Figure S2.** (A) Kinetic experiments of POD-like enzymes (Cu-HCF-HA@Pt: 0.01 mg/mL;  
 27 TMB: 5 mM); (B) Kinetic experiments of GSH-Ox-like enzymes (Cu-HCF-HA@Pt: 0.01  
 28 mg/mL; DTNB: 5 mM).

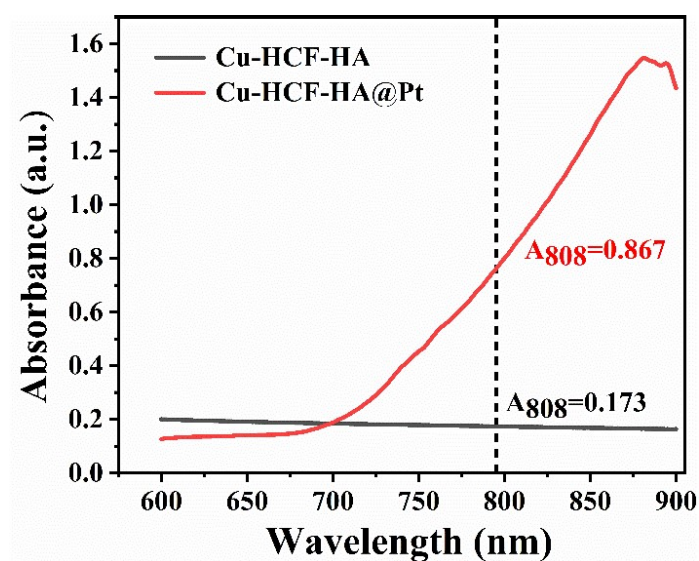

29

30 **Figure S3.** UV-Vis absorption spectra of Cu-HCF-HA and Cu-HCF-HA@Pt NPs.

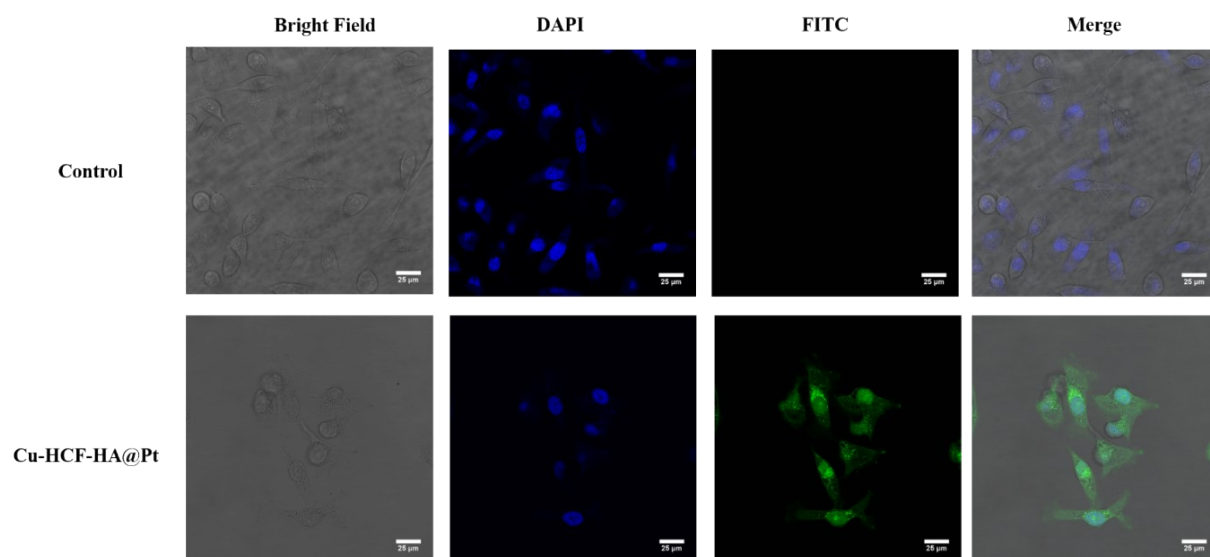

32 **Figure S4.** Laser confocal (CLSM) images of FITC-loaded Cu-HCF-HA@Pt NPs  
33 and HeLa cells after 6 h incubation (excitation wavelength of DAPI: 405 nm,  
34 excitation wavelength of FITC: 488 nm Scale bar: 25 μm).

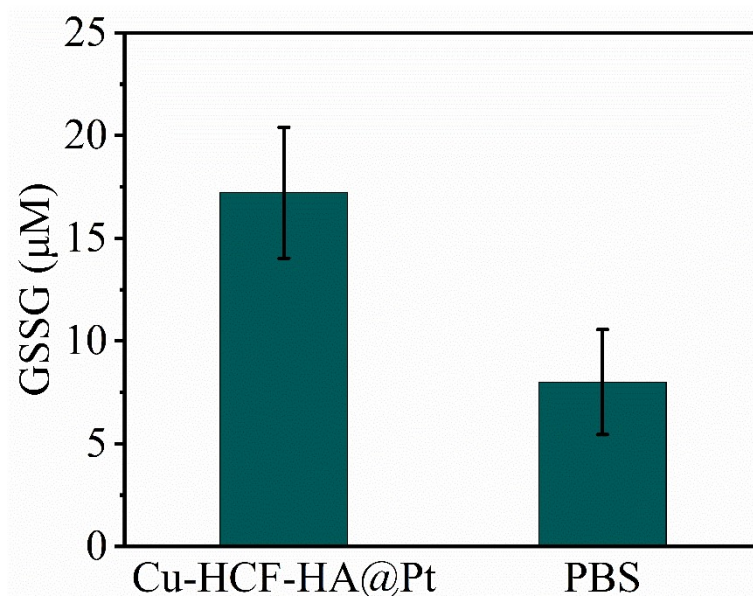

36 **Figure S5.** GSSG concentration in HeLa cells incubated with Cu-HCF-HA@Pt  
and PBS for 24h (n = 3).
